# Supplementary material for: The Mental Well-Being of Health Care Workers during the Peak of the COVID-19 Pandemic—A Nationwide Study in Poland
Source: MDPI journal article supplement (doi:10.3390/ijerph18116101), 2021-06-05
Supplement: s1 [file s1]

---

We would like to learn about your approach to the COVID-19 pandemic and assessment of the implemented “red zone” procedures throughout the country and, at the same time, to assess its impact on the mental condition.

The survey is entirely anonymous and voluntary. You can quit it at any stage. It takes approximately 7 minutes.

It is addressed to all persons over 18 who live in Poland.

1. Do you agree to participate in the study?

- a) Yes
- b) No

### **Sociodemographic section**

1. Sex: Female [ ] Male [ ]

2. Age: ..... [years]

3. Place of residence:

- a) Countryside
- b) City/town with a population under 50,000
- c) City/town with a population between 50,000 and 250,000
- d) City/town with a population over 250,000

4. Level of education:

- a) Primary
- b) Lower secondary
- c) Vocational
- d) Secondary
- e) Incomplete higher
- f) Higher (university degree)

5. Marital status:

- a) Married
- b) Divorced
- c) Widowed
- d) In a relationship
- e) Single

6. Are you a healthcare professional?

- a) Yes
- b) No

7. Have you been deprived of earning opportunities as a result of the pandemic?

- a) Yes, but I have already returned to work and earn the same amount as before
- b) Yes, I have already returned to work, but I earn up to 25% less than before
- c) Yes, I have already returned to work, but I earn over 25% less than before
- d) Yes, I have no income source
- e) No
- f) I have not worked before or during the pandemic

8. Have you used psychiatrist/psychologist support due to the pandemic?

- a) Yes
- b) No

9. Do you suffer from chronic diseases (i.e. hypertension, heart conditions, asthma etc.)

- a) Yes
- b) No

10. Have you been treated psychiatrically in the past?

- a) Yes
- b) No

- 
11. If yes, for what reason?  
Depression / Anxiety disorders / Sleep disorders / Behavioral disorders / Schizophrenia spectrum disorders / Addictions
  12. Have you ever taken psychiatric medications (i.e. Ketrel, Alprazolam, Pramolan, etc.)
    - a) Yes
    - b) No
  13. Have you been placed under quarantine by a Sanitary and Epidemiological Station during the COVID-19 pandemic?
    - a) Yes, I am now in quarantine
    - b) Yes, I have
    - c) No
  14. Have you been diagnosed with COVID-19?
    - a) Yes, I am sick now
    - b) Yes, I have recovered from COVID-19
    - c) No
  15. If so, what was the course of the disease?
    - a) Asymptomatic
    - b) Mild (e.g. headache, cough, temperature below 38 degrees Celsius, self-isolated)
    - c) Moderate (temperature above 38 degrees Celsius, dyspnoea, no hospitalization)
    - d) Hospitalization
  16. Do you think the COVID-19 pandemic has affected your overall mental health?
    - a) Yes, it has significantly deteriorated
    - b) Yes, it has deteriorated
    - c) No
    - d) Yes, it has improved

### **Medical Professionals**

1. If yes, what is your occupation:  
Doctor / Dentist / Nurse / Paramedic / Laboratory diagnostician / Technician / Other
2. Have you been delegated to work at a COVID-19 ward by the hospital or state authorities?
  - a) Yes, by state authorities
  - b) Yes, by hospital authorities
  - c) No
3. Have you had direct contact with COVID-19 patients?
  - a) Yes, in a dedicated COVID-19 hospital
  - b) Yes, at a COVID-19 ward in a different than dedicated COVID-19 hospital
  - c) Yes, both in hospital and as a general practitioner
  - d) Yes, as a general practitioner
  - e) No

---

### Attitudes

1. In your opinion, the state authorities' overall response to COVID-19 is?
  - a) Very good
  - b) Good
  - c) Neither good nor bad
  - d) Bad
  - e) Very bad
2. Do you agree with the restrictions implemented (the whole country being the so-called "red zone") to fight the COVID-19 pandemic?
  - a) Strongly agree
  - b) Agree
  - c) Neither agree nor disagree
  - d) Disagree
  - e) Strongly disagree
3. Since the amendment of recommendations regarding the obligation to wear masks, have you worn masks in open spaces, e.g. parks, playgrounds?
  - a) Yes, always
  - b) Yes, usually
  - c) No
4. Since the amendment of recommendations regarding the obligation to wear masks, have you worn masks indoors, e.g. shopping centres, public transport vehicles?
  - a) Yes, always
  - b) Yes, usually
  - c) No
5. Do you agree that you have been avoiding meetings with your family due to the COVID-19 pandemic?
  - a) Strongly agree
  - b) Agree
  - c) Neither agree nor disagree
  - d) Disagree
  - e) Strongly disagree
6. Do you agree that you have been avoiding meetings with your friends due to the COVID-19 pandemic?
  - a) Strongly agree
  - b) Agree
  - c) Neither yes nor no
  - d) Disagree
  - e) Strongly disagree
7. Do you agree that you have reduced leaving the house to the minimum (shopping, work etc.) due to the COVID-19 pandemic?
  - a) Strongly agree
  - b) Agree
  - c) Neither agree nor disagree
  - d) Disagree
  - e) Strongly disagree
8. Are you afraid of getting infected with COVID-19?
  - a) Yes, the same as other illnesses (i.e. heart diseases)
  - b) Yes, but less than other illnesses (i.e. heart diseases)
  - c) Yes, but more than other illnesses (i.e. heart diseases)
  - d) Not at all
9. On a scale of 1 to 10 (1 - no anxiety, 10 - extreme anxiety), how significant is your anxiety regarding getting infected with COVID-19?.....
10. On a scale of 1 to 10 (1 - no anxiety, 10 - extreme anxiety), how significant is your anxiety regarding your loved ones being infected with COVID-19?.....

11. Do you search for additional information about COVID-19, e.g. online?
  - a) Yes
  - b) No
12. Do you follow daily statistics concerning COVID-19 infections and fatalities?
  - a) Yes
  - b) No
13. Should we all stay at home to contain the COVID-19 pandemic?
  - a) Yes
  - b) No
  - c) It is hard to tell

### The General Health Questionnaire (GHQ-28)

*Have you recently:*

|             |                                                                    |                 |                    |                          |                         |
|-------------|--------------------------------------------------------------------|-----------------|--------------------|--------------------------|-------------------------|
| 1<br>GHQ1   | Been feeling well and enjoying good health?                        | More than usual | Same as usual      | Less than usual          | Much less than usual    |
| 2<br>GHQ2   | Felt constantly under pressure?                                    | Not at all      | No more than usual | Somewhat more than usual | Much more than usual    |
| 3<br>GHQ3   | Been experiencing a feeling of tightness or pressure in your head  | Not at all      | No more than usual | Somewhat more than usual | Much more than usual    |
| 4<br>GHQ4   | Been getting headaches?                                            | Not at all      | No more than usual | Somewhat more than usual | Much more than usual    |
| 5<br>GHQ5   | Felt capable of making decisions about different matters?          | More than usual | Same as usual      | Less than usual          | Incapable               |
| 6<br>GHQ6   | Found at times that you cannot do anything due to anxiety          | Not at all      | No more than usual | Somewhat more than usual | Much more than usual    |
| 7<br>GHQ7   | Been irritable and/or in a bad mood?                               | Not at all      | No more than usual | Somewhat more than usual | Much more than usual    |
| 8<br>GHQ8   | Been feeling ill?                                                  | Not at all      | No more than usual | Somewhat more than usual | Much more than usual    |
| 9<br>GHQ9   | Felt overwhelmed?                                                  | Not at all      | No more than usual | Somewhat more than usual | Much more than usual    |
| 10<br>GHQ10 | Been satisfied with the way you have been carrying out your tasks? | More than usual | Same as usual      | Less than usual          | Completely dissatisfied |
| 11<br>GHQ11 | Been taking longer to do the things you do?                        | Not at all      | Same as usual      | Longer than usual        | Much longer than usual  |
| 12<br>GHQ12 | Been feeling exhausted and out of sorts?                           | Not at all      | No more than usual | Somewhat more than usual | Much more than usual    |
| 13<br>GHQ13 | Found it difficult to go back to sleep after waking up at night?   | Not at all      | No more than usual | Somewhat more than usual | Much more than usual    |
| 14<br>GHQ14 | Been feeling the need to take medications to calm your nerves?     | Not at all      | No more than usual | Somewhat more than usual | Much more than usual    |
| 15<br>GHQ15 | Been feeling anxious and tense all the time?                       | Not at all      | No more than usual | Somewhat more than usual | Much more than usual    |
| 16<br>GHQ16 | Been having hot or cold flashes?                                   | Not at all      | No more than usual | Somewhat more than usual | Much more than usual    |
| 17<br>GHQ17 | Been getting scared or panicky for no good reason?                 | Not at all      | No more than usual | Somewhat more than usual | Much more than usual    |
| 18<br>GHQ18 | Lost much sleep over worry?                                        | Not at all      | No more than usual | Somewhat more than usual | Much more than usual    |
| 19<br>GHQ19 | Felt worthless?                                                    | Not at all      | No more than usual | Somewhat more than usual | Much more than usual    |
| 20<br>GHQ20 | Found yourself wishing you were dead and free from it all?         | Not at all      | No more than usual | Somewhat more than usual | Much more than usual    |
| 21<br>GHQ21 | Felt that life is completely hopeless?                             | Not at all      | No more than usual | Somewhat more than usual | Much more than usual    |

|             |                                                                              |                 |                    |                          |                      |
|-------------|------------------------------------------------------------------------------|-----------------|--------------------|--------------------------|----------------------|
| 22<br>GHQ22 | <b>Felt that life is not worth living?</b>                                   | Not at all      | No more than usual | Somewhat more than usual | Much more than usual |
| 23<br>GHQ23 | <b>Considered taking your own life?</b>                                      | Definitely not  | I do not think so  | It has crossed my mind   | Definitely yes       |
| 24<br>GHQ24 | <b>Found that the idea of taking your own life kept coming to your mind?</b> | Definitely not  | I do not think so  | It has crossed my mind   | Definitely yes       |
| 25<br>GHQ25 | <b>Felt that you play a useful role in your environment?</b>                 | More than usual | Same as usual      | Less than usual          | Much less than usual |
| 26<br>GHQ26 | <b>Felt pleased with your actions in general?</b>                            | More than usual | Same as usual      | Less than usual          | Much less than usual |
| 27<br>GHQ27 | <b>Been able to enjoy your normal day-to-day activities?</b>                 | More than usual | Same as usual      | Less than usual          | Much less than usual |
| 28<br>GHQ28 | <b>Been managing to keep yourself busy with something useful, work?</b>      | More than usual | Same as usual      | Less than usual          | Much less than usual |

Drodzy Państwo, chcielibyśmy poznać Państwa podejście do pandemii COVID-19, ocenę wdrożonych procedur czerwonej strefy w całym kraju oraz jednocześnie ocenić jej wpływ na kondycję psychiczną.

Ankieta jest w pełni anonimowa, dobrowolna, na każdym etapie możliwa jest rezygnacja z udziału w badaniu. Czas trwania około 7 minut.

Skierowana do wszystkich ludzi mieszkających na terenie Polski powyżej 18rż.

1. Czy wyraża Pan(i) zgodę na udział w badaniu?

Tak

Nie

### Sekcja socjodemograficzna

1. Płeć: Kobieta [ ] Mężczyzna [ ]

2. Wiek: ..... lat

3. Miejsce zamieszkania:

- a) Wieś
- b) Miasto <50tys.
- c) Miasto 50-250 tys.
- d) Miasto >250tys. mieszkańców

4. Wykształcenie:

- a) Podstawowe
- b) Gimnazjalne
- c) Zawodowe
- d) Średnie
- e) Wyższe niepełne
- f) Wyższe

5. Jaki jest Pana(i) stan cywilny:

- a) Zameężny/żonaty
- b) Rozwódnik
- c) Wdowa(iec)
- d) Związek partnerski
- e) Panna/Kawaler

6. Czy jest Pan(i) pracownikiem Ochrony zdrowia?

- a) Tak
- b) Nie

7. Czy w związku pandemią został(a) Pan(i) pozbawiony(a) możliwości zarobkowych?

- a) Tak, ale już wróciłem(a) do pracy i moje zarobki nie uległy zmianie na gorsze
- b) Tak, wróciłem(a) do pracy, lecz moje zarobki zmalały o nie więcej niż 25%
- c) Tak, wróciłem(a) do pracy, lecz moje zarobki zmalały o więcej niż 25%

- 
- d) Tak, zostałem całkowicie pozbawiony(a) dochodu  
e) Nie  
f) Zarówno przed jak i w trakcie pandemii nie pracowałem(am)
8. Czy w związku z pandemią korzystał(a) Pan(i) z usług psychiatry/psychologa?  
a) Tak  
b) Nie
9. Czy leczy się Pan z powodu schorzeń przewlekłych (np. nadciśnienie tętnicze, choroby serca, astma itp.)  
a) Tak  
b) Nie
10. Czy w przeszłości leczył(a) się Pan(i) psychiatrycznie?  
a) Tak  
b) Nie
11. Jeśli tak to z jakiego powodu?  
Depresja/Zaburzenia lękowe/Zaburzenia snu/ Zaburzenia zachowania/ Choroby z kręgu schizofrenii/ Uzależnienia
12. Czy przyjmował(a) Pan(i) leki psychiatryczne (np. keterel, alprazolam, pramolan, etc.)  
a) Tak  
b) Nie
13. Czy w czasie pandemii COVID-19 został(a) Pan(i) objęta kwarantanną przez Stację Sanitarno-epidemiologiczną?  
a) Tak, jestem  
b) Tak, byłem  
c) Nie
14. Czy zdiagnozowano u Pana(i) COVID-19?  
a) Tak, jestem w trakcie choroby  
b) Tak jestem po chorobie  
c) Nie
15. Jeśli tak, to jaki był przebieg choroby?  
Bezobjawowy/ Skąpoobjawowy ( np. ból głowy, kaszel, gorączka <38stpC, pobyt w domu)/ Przebieg umiarkowany ( temp. >38stp, duszność, bez hospitalizacji)/ Hospitalizacja
16. Czy według Pana(i) pandemia COVID-19 wpłynęła na ogólne Pana zdrowie psychiczne?  
a) Tak, zdecydowanie się pogorszyła  
b) Tak, pogorszyła się  
c) Nie  
d) Tak, uległa poprawie

### **Pracownik Ochrony Zdrowia**

17. Jeśli tak to w jakim charakterze Pan(i) pracuje:  
Lekarz/ Lekarz dentysta/pielęgniarstwo/ Ratownictwo medyczne/ Laborant/ Technik/ Inne
18. Czy został(a) Pan(i) oddelegowana przez dyrekcję lub rząd do pracy w oddziale COVIDowym?  
a) Tak, rząd  
b) Tak, dyrekcja szpitala  
c) Nie
19. Czy pracował(a) Pan(i) bezpośrednio z pacjentami chorującymi na COVID-19?  
a) Tak, szpital jednoimienny  
b) Tak, oddział covidowy w szpitalu innym niż jednoimienny  
c) Tak, zarówno w szpitalu jak i w ramach POZ

- d) Podstawowa Opieka Zdrowotna
- e) Nie

### Postawy

20. Jak ocenia Pan(i) dotychczasowe działania rządu w sprawie zwalczania COVID-19
- a) Bardzo dobrze
  - b) Dobrze
  - c) Ani dobrze, ani źle
  - d) Źle
  - e) Bardzo źle
21. Czy zgadza się Pan z działaniami podjętymi w Polsce (cały kraj objęty czerwoną strefą) w celu zwalczania pandemii COVID-19?
- a) Zdecydowanie się zgadza
  - b) Zgadzam się
  - c) Ani tak ani nie
  - d) Nie zgadzam się
  - e) Zdecydowanie się nie zgadzam
22. Czy od czasu zmiany zaleceń co do konieczności noszenia maseczek nosi Pan(i) maseczki na otwartej przestrzeni np. parki, place zabaw?
- a) Tak, zawsze
  - b) Tak, zazwyczaj
  - c) Nie
23. Czy od czasu zmiany zaleceń co do konieczności noszenia maseczek nosi Pan(i) maseczki w miejscach zamkniętych np. galerie handlowe, komunikacja?
- a) Tak, zawsze
  - b) Tak, zazwyczaj
  - c) Nie
24. W związku z pandemią COVID-19 unika Pan(i) spotkań z najbliższą rodziną?
- a) Zdecydowanie się zgadza
  - b) Zgadzam się
  - c) Nni tak ani nie
  - d) Nie zgadzam się
  - e) Zdecydowanie się nie zgadzam
25. W związku z pandemią COVID-19 unika Pan(i) spotkań z przyjaciółmi?
- a) Zdecydowanie się zgadza
  - b) Zgadzam się
  - c) Ani tak ani nie
  - d) Nie zgadzam się
  - e) Zdecydowanie się nie zgadzam
26. W związku z pandemią COVID-19 wyjścia z domu ograniczam do minimum (zakupy, praca itp.)?
- a) Zdecydowanie się zgadza
  - b) Zgadzam się
  - c) Ani tak ani nie
  - d) Nie zgadzam się
  - e) Zdecydowanie się nie zgadzam
27. Czy boi się Pani/Pan zachorowania na COVID-19?
- a) Tak, w takim samym stopniu jak na inne choroby (np. serca)
  - b) Tak, ale w mniejszym stopniu jak na inne choroby (np. serca)
  - c) Tak, ale w większym stopniu jak na inne choroby (np. serca)
  - d) Nie, nie boję się w ogóle
28. W skali od 1 - 10 jak bardzo obawia się Pan(i) zachorowania na COVID-19? [ .....

29. W skali od 1 - 10 jak bardzo obawia się Pan(i) zachorowania na COVID-19 przez członków rodziny? ...
30. Czy wyszukuje Pan(i) dodatkowych informacji odnośnie COVID-19 np. w internecie?
- a) Tak
- b) Nie
30. Czy śledzi Pan(i) codzienne statystyki odnośnie zachorowań oraz śmiertelności z powodu COVID-19?
- a) Tak
- b) Nie
31. W celu zahamowania pandemii COVID-19 wszyscy powinniśmy zostać w domach?
- a) Tak
- b) Nie
- c) Trudno
- powiedzieć

## OGÓLNY KWESTIONARIUSZ ZDROWIA (GHQ-28)

*Czy Pan(i) ostatnio:*

|             |                                                                           |                     |                         |                           |                          |
|-------------|---------------------------------------------------------------------------|---------------------|-------------------------|---------------------------|--------------------------|
| 1<br>GHQ1   | <b>Czuje się dobrze i cieszy się dobrym zdrowiem?</b>                     | bardziej niż zwykle | tak jak zwykle          | mniej niż zwykle          | dużo mniej niż zwykle    |
| 2<br>GHQ2   | <b>Czuje, że jest stale pod presją?</b>                                   | zupełnie nie        | nie bardziej niż zwykle | nieco bardziej niż zwykle | dużo bardziej niż zwykle |
| 3<br>GHQ3   | <b>Ma uczucie ucisku, napięcia w głowie?</b>                              | zupełnie nie        | nie bardziej niż zwykle | nieco bardziej niż zwykle | dużo bardziej niż zwykle |
| 4<br>GHQ4   | <b>Ma bóle głowy?</b>                                                     | zupełnie nie        | nie bardziej niż zwykle | nieco bardziej niż zwykle | dużo bardziej niż zwykle |
| 5<br>GHQ5   | <b>Czuje się zdolny(a) do podejmowania decyzji w różnych sprawach?</b>    | bardziej niż zwykle | tak jak zwykle          | mniej niż zwykle          | zupełnie niezdolny       |
| 6<br>GHQ6   | <b>Czuje, że czasami nie może nic robić ze względu na nerwy?</b>          | zupełnie nie        | nie bardziej niż zwykle | nieco bardziej niż zwykle | dużo bardziej niż zwykle |
| 7<br>GHQ7   | <b>Jest rozdrażniony(a) i w złym humorze?</b>                             | zupełnie nie        | nie bardziej niż zwykle | nieco bardziej niż zwykle | dużo bardziej niż zwykle |
| 8<br>GHQ8   | <b>Czuje, że jest Pan(i) chory(a)?</b>                                    | zupełnie nie        | nie bardziej niż zwykle | nieco bardziej niż zwykle | dużo bardziej niż zwykle |
| 9<br>GHQ9   | <b>Czuje, że wszystko Pana(ia) przytłacza?</b>                            | zupełnie nie        | nie bardziej niż zwykle | nieco bardziej niż zwykle | dużo bardziej niż zwykle |
| 10<br>GHQ10 | <b>Jest zadowolony(a) ze sposobu wykonywania swoich obowiązków?</b>       | bardziej niż zwykle | tak jak zwykle          | mniej niż zwykle          | całkowicie niezadowolony |
| 11<br>GHQ11 | <b>Wykonywał(a) wszystkie czynności wolniej?</b>                          | zupełnie nie        | tak jak zwykle          | dłużej niż zwykle         | dużo dłużej niż zwykle   |
| 12<br>GHQ12 | <b>Czuje się wyczerpany(a), niedysponowany(a)?</b>                        | zupełnie nie        | nie bardziej niż zwykle | nieco bardziej niż zwykle | dużo bardziej niż zwykle |
| 13<br>GHQ13 | <b>Ma kłopoty z ponownym zaśnięciem po przebudzeniu się ?</b>             | zupełnie nie        | nie bardziej niż zwykle | nieco bardziej niż zwykle | dużo bardziej niż zwykle |
| 14<br>GHQ14 | <b>Ma potrzebę zażywania środków uspokajających?</b>                      | zupełnie nie        | nie bardziej niż zwykle | nieco bardziej niż zwykle | dużo bardziej niż zwykle |
| 15<br>GHQ15 | <b>Czuje się zdenerwowany(a) i napięty(a) przez cały czas?</b>            | zupełnie nie        | nie bardziej niż zwykle | nieco bardziej niż zwykle | dużo bardziej niż zwykle |
| 16<br>GHQ16 | <b>Czuje, że oblewa Pana(ia) gorąco lub zimno?</b>                        | zupełnie nie        | nie bardziej niż zwykle | nieco bardziej niż zwykle | dużo bardziej niż zwykle |
| 17<br>GHQ17 | <b>Był(a) przestraszony(a) lub bliski(a) paniki bez wyraźnego powodu?</b> | zupełnie nie        | nie bardziej niż zwykle | nieco bardziej niż zwykle | dużo bardziej niż zwykle |
| 18<br>GHQ18 | <b>Mniej spał(a) z powodu zamartwiania się?</b>                           | zupełnie nie        | nie bardziej niż zwykle | nieco bardziej niż zwykle | dużo bardziej niż zwykle |



|             |                                                                            |                     |                         |                           |                          |
|-------------|----------------------------------------------------------------------------|---------------------|-------------------------|---------------------------|--------------------------|
| 19<br>GHQ19 | Uważa siebie za osobę bezwartościową?                                      | zupełnie nie        | nie bardziej niż zwykle | nieco bardziej niż zwykle | dużo bardziej niż zwykle |
| 20<br>GHQ20 | Pragnął/Pragnęła umrzeć i być daleko od wszystkich spraw?                  | zupełnie nie        | nie bardziej niż zwykle | nieco bardziej niż zwykle | dużo bardziej niż zwykle |
| 21<br>GHQ21 | Ma poczucie, że życie jest beznadziejne?                                   | zupełnie nie        | nie bardziej niż zwykle | nieco bardziej niż zwykle | dużo bardziej niż zwykle |
| 22<br>GHQ22 | Myślał(a), że nie warto żyć?                                               | zupełnie nie        | nie bardziej niż zwykle | nieco bardziej niż zwykle | dużo bardziej niż zwykle |
| 23<br>GHQ23 | Brał(a) pod uwagę możliwość odebrania sobie życia ?                        | stanowczo nie       | nie sędzę               | przeszło mi przez myśl    | stanowczo tak            |
| 24<br>GHQ24 | Zauważył(a), że przychodzi Panu(i) do głowy myśl o odebraniu sobie życia ? | stanowczo nie       | nie sędzę               | przeszło mi przez myśl    | stanowczo tak            |
| 25<br>GHQ25 | Ma poczucie, że odgrywa znaczącą rolę w otoczeniu?                         | bardziej niż zwykle | tak jak zwykle          | mniejszą niż zwykle       | Znacznie mniejszą        |
| 26<br>GHQ26 | Jest ogólnie zadowolony(a) ze swoich działań ?                             | bardziej niż zwykle | tak jak zwykle          | mniej niż zwykle          | dużo mniej niż zwykle    |
| 27<br>GHQ27 | Potrafi cieszyć się zwykłymi codziennymi zajęciami?                        | bardziej niż zwykle | tak jak zwykle          | mniej niż zwykle          | dużo mniej niż zwykle    |
| 28<br>GHQ28 | Potrafił(a) wypełnić sobie czas pożytecznymi zajęciami, pracą?             | bardziej niż zwykle | tak jak zwykle          | mniej niż zwykle          | dużo mniej niż zwykle    |
